# Supplementary material
Source: Springer Nature journal article supplement (https://www.springermedizin.de/resource/supplementary/12885_2009_1836_MOESM7_ESM.pdf/9460674)
Supplement: MOESM7 [file 9460674]

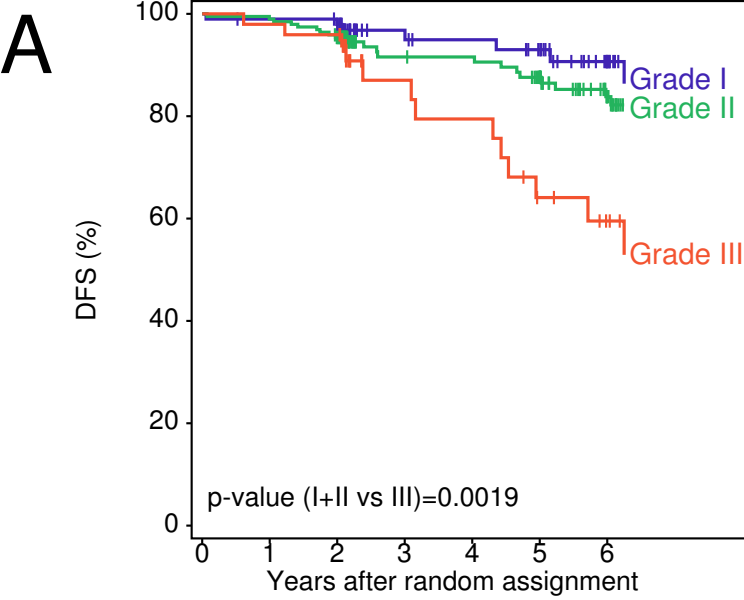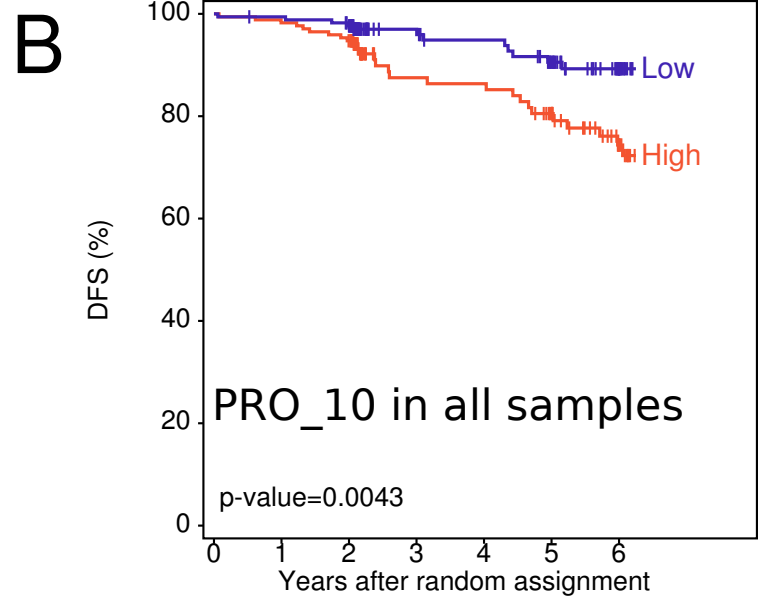

| Group     | 0   | 1   | 2   | 3   | 4   | 5   | 6  | Events |
|-----------|-----|-----|-----|-----|-----|-----|----|--------|
| Grade I   | 98  | 96  | 93  | 52  | 49  | 45  | 28 | 6      |
| Grade II  | 195 | 193 | 184 | 93  | 92  | 82  | 54 | 21     |
| Grade III | 49  | 48  | 47  | 23  | 21  | 15  | 11 | 12     |
| Total     | 342 | 337 | 324 | 168 | 162 | 142 | 93 | 39     |

| Group | 0   | 1   | 2   | 3   | 4   | 5   | 6  | Events |
|-------|-----|-----|-----|-----|-----|-----|----|--------|
| High  | 171 | 168 | 161 | 75  | 74  | 64  | 38 | 27     |
| Low   | 171 | 169 | 163 | 93  | 88  | 78  | 55 | 12     |
| Total | 342 | 337 | 324 | 168 | 162 | 142 | 93 | 39     |

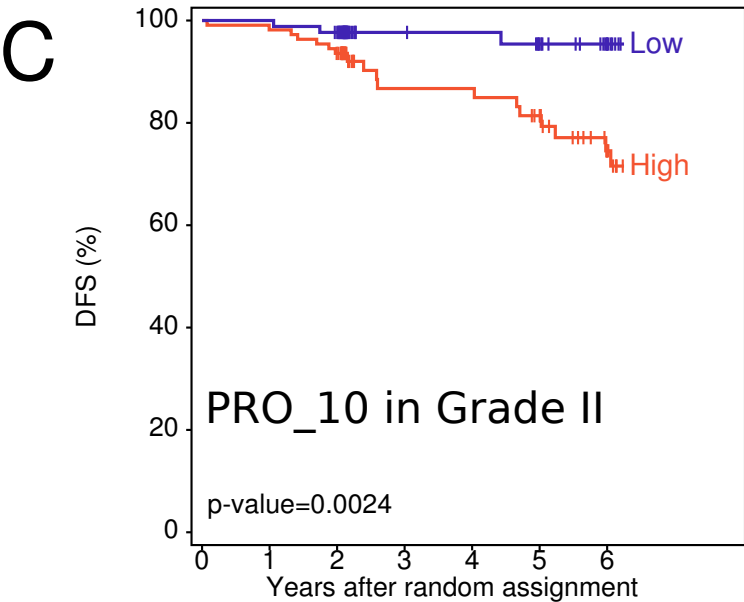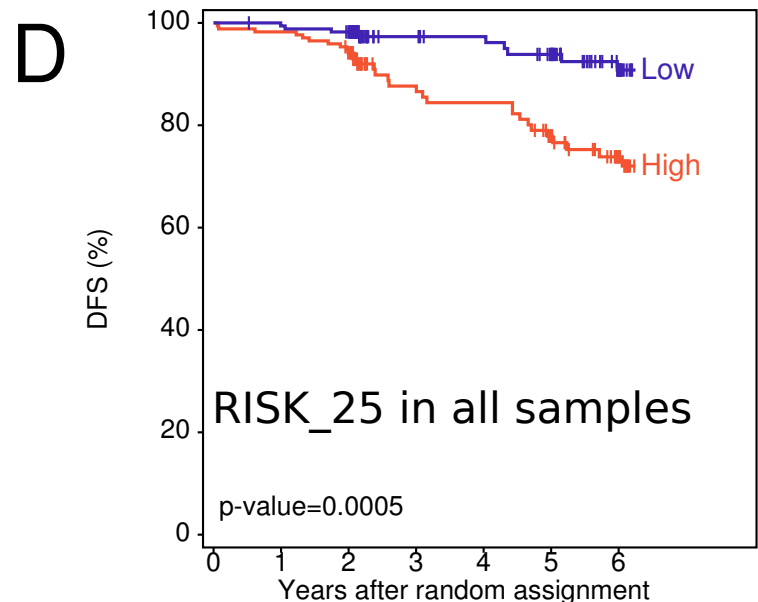

| Group | 0   | 1   | 2   | 3  | 4  | 5  | 6  | Events |
|-------|-----|-----|-----|----|----|----|----|--------|
| High  | 109 | 107 | 101 | 49 | 49 | 44 | 26 | 18     |
| Low   | 86  | 86  | 83  | 44 | 43 | 38 | 28 | 3      |
| Total | 195 | 193 | 184 | 93 | 92 | 82 | 54 | 21     |

| Group | 0   | 1   | 2   | 3   | 4   | 5   | 6  | Events |
|-------|-----|-----|-----|-----|-----|-----|----|--------|
| High  | 171 | 168 | 159 | 81  | 78  | 66  | 43 | 30     |
| Low   | 171 | 169 | 165 | 87  | 84  | 76  | 50 | 9      |
| Total | 342 | 337 | 324 | 168 | 162 | 142 | 93 | 39     |

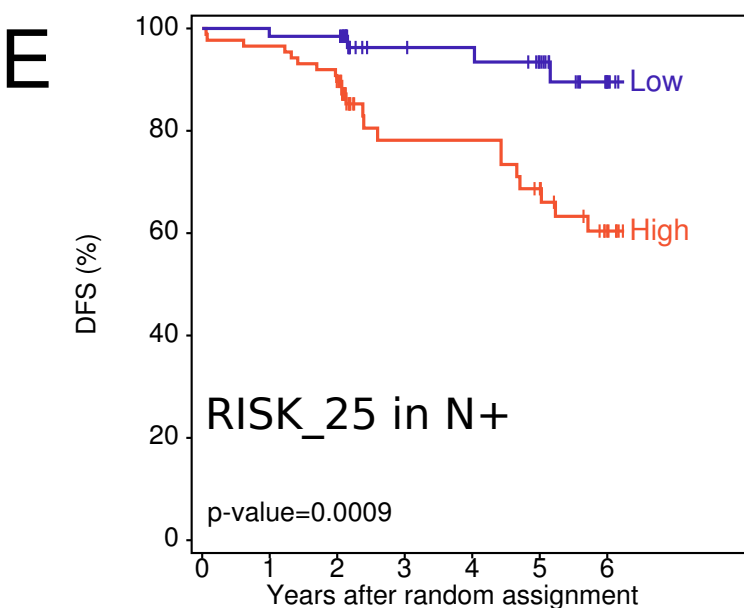

| Group | 0   | 1   | 2   | 3  | 4  | 5  | 6  | Events |
|-------|-----|-----|-----|----|----|----|----|--------|
| High  | 87  | 84  | 77  | 33 | 33 | 28 | 16 | 22     |
| Low   | 65  | 64  | 64  | 35 | 34 | 29 | 17 | 4      |
| Total | 152 | 148 | 141 | 68 | 67 | 57 | 33 | 26     |
